# Supplementary material for: A study on the versatility of metallacycles in host–guest chemistry: Interactions in halide-centered hexanuclear copper(ii) pyrazolate complexes
Source: Royal Society of Chemistry journal article supplement (doi:10.1039/c4cp01238k), 2014-01-01
Supplement: c4cp01238k1.pdf [file c4cp01238k1.pdf]

## SUPPORTING INFORMATION FOR:

*On the versatility of metallacycles in Host-Guest Chemistry. Interactions in Halide-centered hexanuclear copper (II) pyrazolate complexes.*

**Figure S1.** Representation of the quadrupole moment tensor ( $\Theta$ ) for a representative Cu (II) center, in the hypothetical noble gases-centered pyrazolate complexes **1-Ne**, **1-Ar**, **1-Kr** and **1-Xe**.

**Figure S2** Representation of the magnetic response, showing the bond critical points of the Cu<sub>6</sub>-Cl interaction.

**Table S1.** Energy decomposition Analysis under the TPSS/ZORA level for **1-Cl** considering acetonitrile as solvent (kcal/mol).

**Table S2.** Selected calculated distances and angles of the **1-Ne**, **1-Ar**, **1-Kr** and **1-Xe** complexes (Å).

**Table S3.** Energy Decomposition Analysis of the **1-Ne**, **1-Ar**, **1-Kr** and **1-Xe** complexes (kcal/mol).

**Table S4.** Energy Decomposition Analysis under the PBE/ZORA level for some relevant studied systems (kcal/mol).

**Table S5.** Principal components of the electronic quadrupole tensors of a representative Cu (II) center and the guests, at the PBE/ZORA level for some relevant studied systems (Buckingham).

**Table S6.** Comparison of the performance of several hybrid, GGA, and meta-GGA functionals in the calculation of the Electronic Quadrupole Tensors of the different noble-gas guests, denoting on the principal axis system (Buckingham).

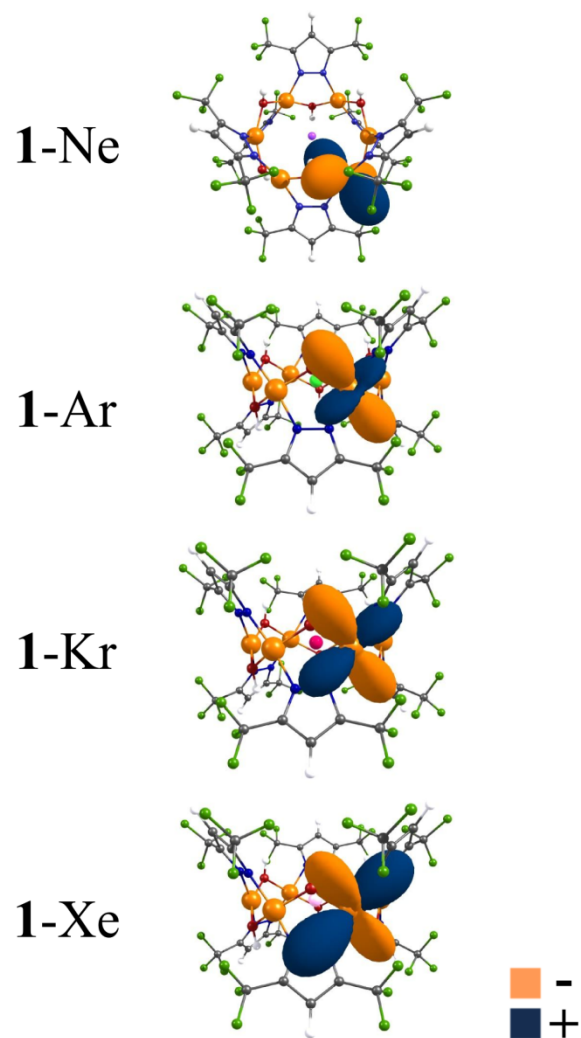

**Figure S1.** Representation of the quadrupole moment tensor ( $\Theta$ ) for a representative Cu (II) center, in the hypothetical noble gases-centered pyrazolate complexes **1-Ne**, **1-Ar**, **1-Kr** and **1-Xe**.

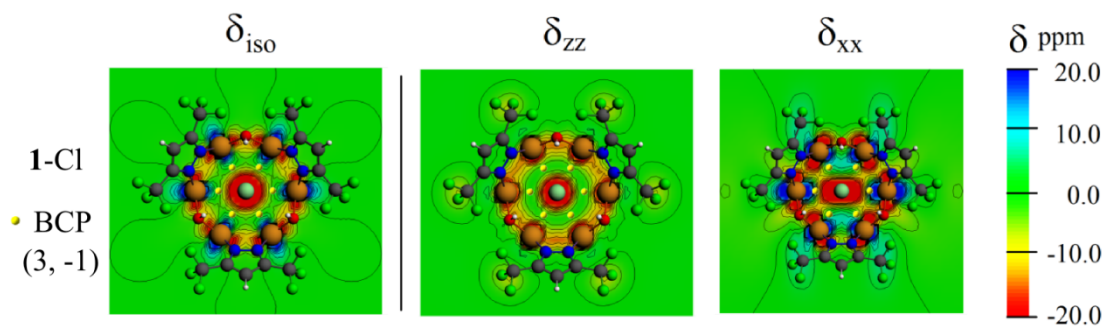

**Figure S2.** Representation of the magnetic response, showing the bond critical points of the  $\text{Cu}_6\text{-Cl}$  interaction.

**Table S1.** Energy decomposition Analysis under the TPSS/ZORA level for **1-Cl** considering acetonitrile as solvent (kcal/mol).

|                    | <b>1-Cl</b> |        |
|--------------------|-------------|--------|
| $\Delta E_{orb}$   | -34.15      | 25.72% |
| $\Delta E_{elec}$  | -91.09      | 68.60% |
| $\Delta E_{disp}$  | -7.54       | 5.68%  |
| $\Delta E_{Pauli}$ | 58.23       |        |
| $\Delta E_{int}$   | -74.55      |        |

**Table S2.** Selected calculated distances and angles of the **1-Ne**, **1-Ar**, **1-Kr** and **1-Xe** complexes (Å).

| $[trans-Cu_6\{\mu-3,5-(CF_3)_2pz\}_6(\mu-OH)_6Ng]$ , Ng = Ar, Kr, Xe |             |             |             |             |
|----------------------------------------------------------------------|-------------|-------------|-------------|-------------|
|                                                                      | <b>1-Ne</b> | <b>1-Ar</b> | <b>1-Kr</b> | <b>1-Xe</b> |
| Diam. Cu <sub>6</sub>                                                | 6.405       | 6.441       | 6.447       | 6.489       |
| Cu–Cu                                                                | 3.203       | 3.220       | 3.224       | 3.245       |
| Cu···(center of the cavity)                                          | 3.203       | 3.220       | 3.224       | 3.245       |
| H···(center of the cavity)                                           | 3.619       | 3.646       | 3.666       | 3.694       |
| (Cu <sub>6</sub> plane)–(Cu–N–N–Cu plane) angle                      | 118         | 117         | 117         | 116         |
| (Cu <sub>6</sub> plane)–(Cu–O–Cu plane) angle                        | 114         | 116         | 116         | 117         |

**Table S3.** Energy Decomposition Analysis of the **1-Ne**, **1-Ar**, **1-Kr** and **1-Xe** complexes under the TPSS/ZORA level (kcal/mol).

|                    | <b>1-Ne</b> |        | <b>1-Ar</b> |       | <b>1-Kr</b> |       | <b>1-Xe</b> |       |
|--------------------|-------------|--------|-------------|-------|-------------|-------|-------------|-------|
| $\Delta E_{orb}$   | -0.15       | 2.19%  | -3.54       | 15.0% | -5.87       | 16.0% | -11.24      | 18.4% |
| $\Delta E_{elec}$  | -2.89       | 42.19% | -11.70      | 49.7% | -20.82      | 56.7% | -38.07      | 62.3% |
| $\Delta E_{disp}$  | -3.81       | 55.62% | -8.30       | 35.3% | -10.03      | 27.3% | -11.80      | 19.3% |
| $\Delta E_{Pauli}$ | 4.12        |        | 22.99       |       | 40.10       |       | 67.16       |       |
| $\Delta E_{int}$   | -2.73       |        | -0.55       |       | 3.38        |       | 6.05        |       |

**Table S4.** Energy Decomposition Analysis under the PBE/ZORA level for some relevant studied systems (kcal/mol).

|                    | <b>1-Cl</b> |       | <b>1-Br</b> |       | <b>1-I</b> |       | <b>1-Ar</b> |       | <b>1-Kr</b> |       | <b>1-Xe</b> |       |
|--------------------|-------------|-------|-------------|-------|------------|-------|-------------|-------|-------------|-------|-------------|-------|
| $\Delta E_{orb}$   | -33.86      | 25.0% | -31.95      | 19.0% | -33.30     | 15.8% | -4.77       | 20.2% | -6.77       | 18.6% | -9.90       | 17.1% |
| $\Delta E_{elec}$  | -96.27      | 71.0% | -129.63     | 77.1% | -170.31    | 80.6% | -12.83      | 54.4% | -22.57      | 61.9% | -39.73      | 68.6% |
| $\Delta E_{disp}$  | -5.43       | 4.0%  | -6.52       | 3.9%  | -7.71      | 3.6%  | -5.99       | 25.4% | -7.13       | 19.6% | -8.28       | 14.3% |
| $\Delta E_{Pauli}$ | 59.46       |       | 98.65       |       | 154.30     |       | 21.94       |       | 36.82       |       | 64.51       |       |
| $\Delta E_{int}$   | -76.10      |       | -69.45      |       | -57.02     |       | -1.65       |       | 0.35        |       | 6.60        |       |

**Table S5.** Principal components of the electronic quadrupole tensors of a representative Cu (II) center and the guests, at the PBE/ZORA level for some relevant studied systems (Buckingham's).

|             | Cu            |               |               |                         | X             |               |               |                         |
|-------------|---------------|---------------|---------------|-------------------------|---------------|---------------|---------------|-------------------------|
|             | $\Theta_{11}$ | $\Theta_{22}$ | $\Theta_{33}$ | $\Theta_{\text{aniso}}$ | $\Theta_{11}$ | $\Theta_{22}$ | $\Theta_{33}$ | $\Theta_{\text{aniso}}$ |
| <b>1</b>    | 0.241         | 0.053         | -0.294        | -0.441                  | -             | -             | -             | -                       |
|             |               |               |               |                         |               |               |               |                         |
| <b>1-Cl</b> | 0.395         | -0.160        | -0.235        | -0.353                  | 0.193         | 0.193         | -0.385        | -0.578                  |
| <b>1-Br</b> | 0.421         | -0.154        | -0.267        | -0.401                  | 0.121         | 0.121         | -0.242        | -0.363                  |
| <b>1-I</b>  | 0.558         | -0.147        | -0.411        | -0.617                  | 1.357         | 1.357         | -2.714        | -4.071                  |
|             |               |               |               |                         |               |               |               |                         |
| <b>1-Ar</b> | 0.227         | 0.076         | -0.304        | -0.456                  | 0.025         | 0.025         | -0.050        | -0.075                  |
| <b>1-Kr</b> | 0.287         | 0.006         | -0.293        | -0.440                  | 0.044         | 0.044         | -0.088        | -0.132                  |
| <b>1-Xe</b> | 0.435         | -0.091        | -0.344        | -0.516                  | 0.574         | 0.574         | -1.149        | -1.723                  |

**Table S6.** Comparison of the performance of several hybrid, GGA, and meta-GGA functionals in the calculation of the Electronic Quadrupole Tensors of the different noble-gas guests, denoting on the principal axis system (Buckingham's).

| [ <i>trans</i> -Cu <sub>6</sub> { $\mu$ -3,5-(CF <sub>3</sub> ) <sub>2</sub> pz} <sub>6</sub> ( $\mu$ -OH) <sub>6</sub> Ng], Ng = Ar, Kr, Xe |               |               |               |               |               |               |               |               |               |
|----------------------------------------------------------------------------------------------------------------------------------------------|---------------|---------------|---------------|---------------|---------------|---------------|---------------|---------------|---------------|
|                                                                                                                                              | 1-Ar          |               |               | 1-Kr          |               |               | 1-Xe          |               |               |
|                                                                                                                                              | $\Theta_{11}$ | $\Theta_{22}$ | $\Theta_{33}$ | $\Theta_{11}$ | $\Theta_{22}$ | $\Theta_{33}$ | $\Theta_{11}$ | $\Theta_{22}$ | $\Theta_{33}$ |
| B1LYP                                                                                                                                        | 0.0174        | 0.0174        | -0.0349       | 0.0335        | 0.0335        | -0.0669       | 0.5271        | 0.5271        | -1.0543       |
| B3LYP                                                                                                                                        | 0.0189        | 0.0189        | -0.0378       | 0.0359        | 0.0359        | -0.0718       | 0.5390        | 0.5390        | -1.0780       |
| O3LYP                                                                                                                                        | 0.0205        | 0.0205        | -0.0410       | 0.0383        | 0.0361        | -0.0744       | 0.5610        | 0.5637        | -1.1247       |
| BP86                                                                                                                                         | 0.0265        | 0.0265        | -0.0529       | 0.0453        | 0.0453        | -0.0906       | 0.5720        | 0.5720        | -1.1441       |
| PW91                                                                                                                                         | 0.0251        | 0.0251        | -0.0503       | 0.0431        | 0.0431        | -0.0861       | 0.5696        | 0.5696        | -1.1392       |
| PBE                                                                                                                                          | 0.0252        | 0.0252        | -0.0504       | 0.0442        | 0.0442        | -0.0885       | 0.574         | 0.574         | -1.490        |
| PBE0                                                                                                                                         | 0.0252        | 0.0252        | -0.0504       | 0.0442        | 0.0442        | -0.0885       | 0.5745        | 0.5745        | -1.1490       |
| M06L                                                                                                                                         | 0.0195        | 0.0195        | -0.0389       | 0.0424        | 0.0424        | -0.0847       | 0.4779        | 0.4779        | -0.9557       |
| TPSS                                                                                                                                         | 0.024         | 0.024         | -0.049        | 0.041         | 0.041         | -0.082        | 0.565         | 0.565         | -1.130        |
